# Supplementary material for: Detection of volatile organic compounds, water in organic solvents, and anions using all-in-one type fluorescent emitters, and their data protection applications
Source: Royal Society of Chemistry journal article supplement (doi:10.1039/d2tc01332k), 2022-01-01
Supplement: d2tc01332k1.pdf [file d2tc01332k1.pdf]

## **Electronic Supplementary Information**

### **All-in-one type fluorescent emitters achieving detections of volatile organic compound, water in organic solvent and anion, and their data protection applications**

Jianglan Wu, Chencheng Li, Qiaobin Chen, Lihua Xu, Maoyang Jian , Jiang Zhao\*

School of Chemistry and Chemical Engineering, Guizhou University, Guiyang 550025, P. R. China.

\*Corresponding Author E-mail: [jiangzhao@gzu.edu.cn](mailto:jiangzhao@gzu.edu.cn). (J. Zhao)

**Table S1.** Selected examples organic emitters applied in the VOCs, the content water in organic solvents, and the F<sup>-</sup> detections fields, the number of the sensors corresponded to the literatures number.

|                                                                            |                                                                                             |                                                                                             |                                                                                               |
|----------------------------------------------------------------------------|---------------------------------------------------------------------------------------------|---------------------------------------------------------------------------------------------|-----------------------------------------------------------------------------------------------|
| <p>VOCs<br/>detection</p>                                                  | 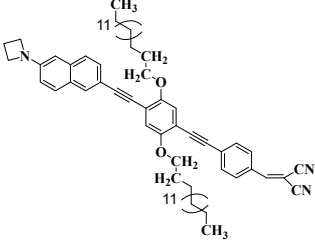 <p>1</p>  |  <p>2</p> |  <p>3</p>  |
| <p>the<br/>content<br/>water in<br/>organic<br/>solvents<br/>detection</p> |  <p>4</p>  |  <p>5</p> |  <p>6</p>  |
| <p>F<sup>-</sup><br/>detection</p>                                         |  <p>7</p> |  <p>8</p> |  <p>9</p> |

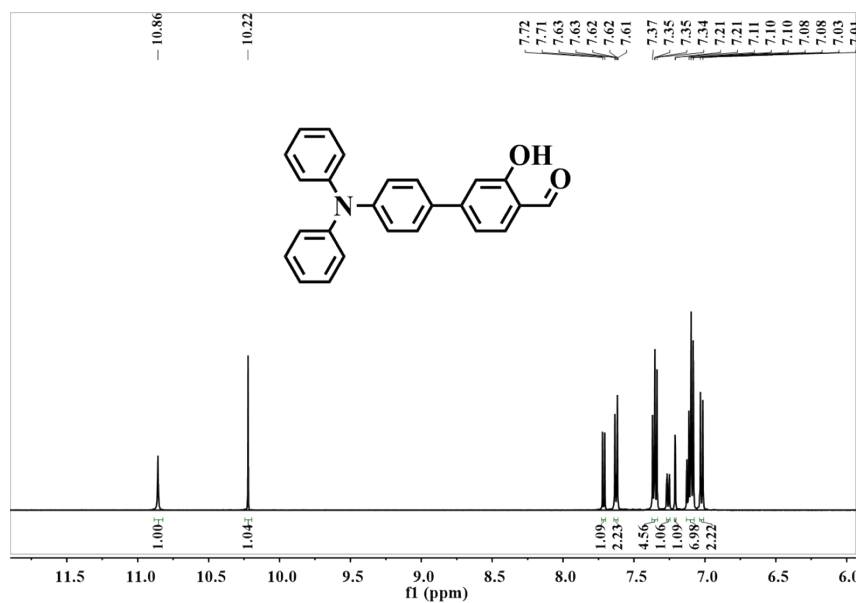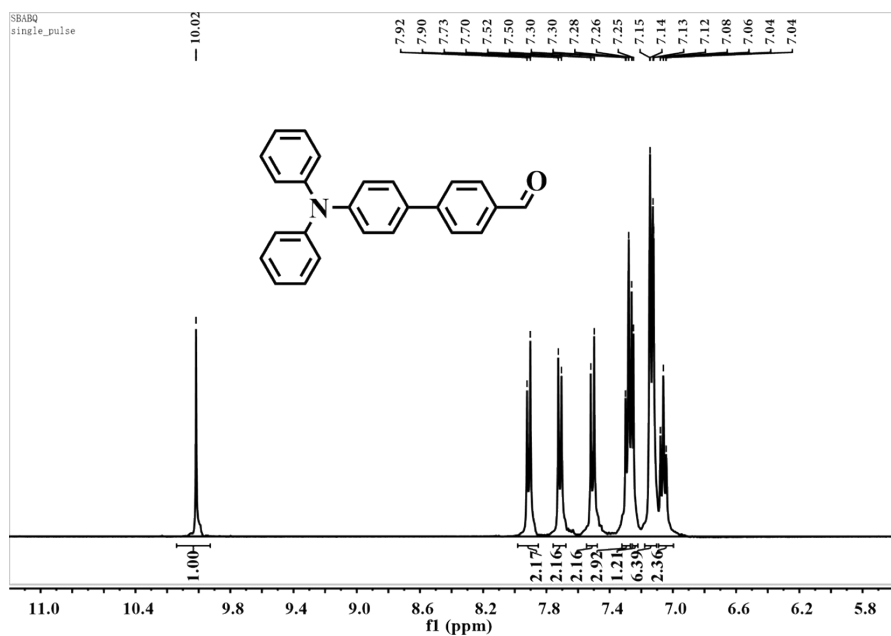

Fig. S1 <sup>1</sup>H NMR spectra of TPA-SYQ and TPA-BQ.

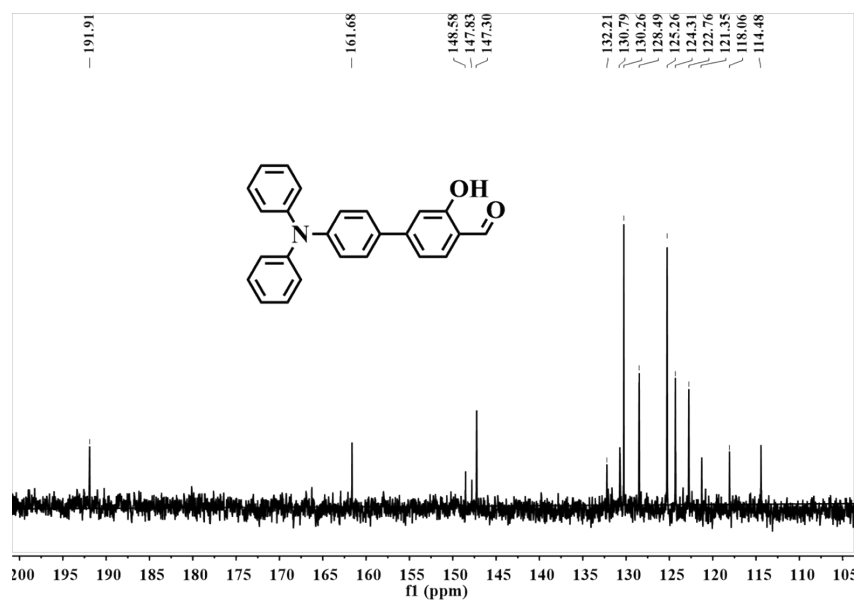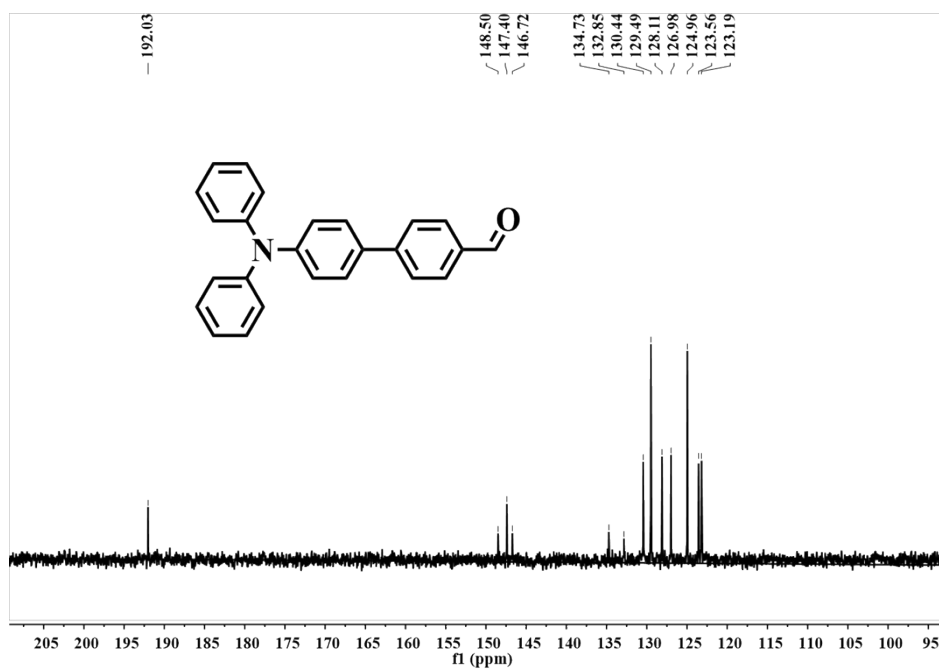

Fig. S2  $^{13}\text{C}$  NMR spectra of TPA-SYQ and TPA-BQ.

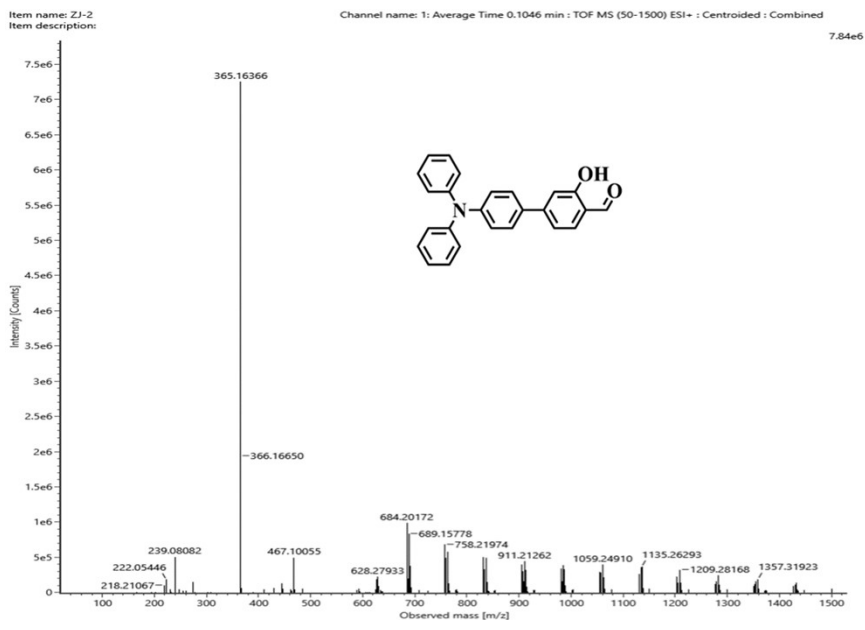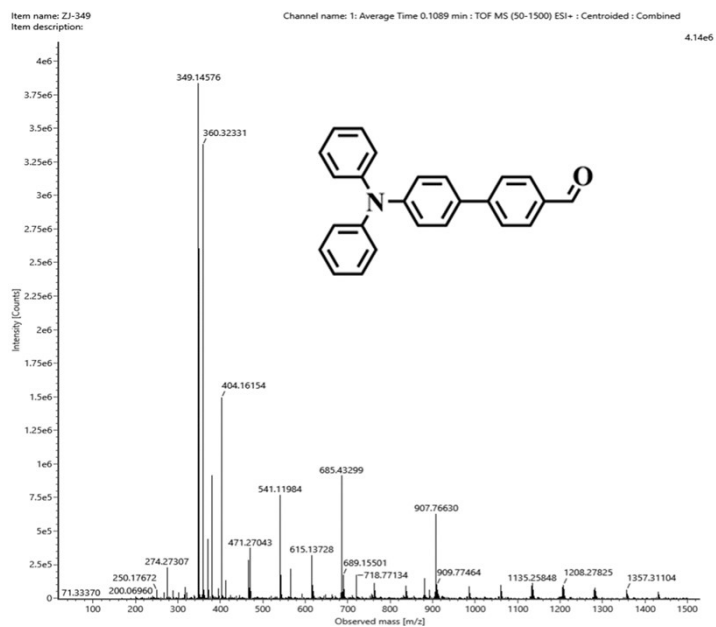

**Fig. S3** Mass spectra of TPA-SYQ and TPA-BQ

**Table S2.** Single crystal data for the two sensors of TPA-SYQ and TPA-BQ

| Parameters             | TPA-SYQ                                          | TPA-BQ                                 |
|------------------------|--------------------------------------------------|----------------------------------------|
| Empirical formula      | C <sub>25</sub> H <sub>19</sub> N O <sub>2</sub> | 2(C <sub>25</sub> H <sub>19</sub> N O) |
| Formula weight         | 365.41                                           | 698.82                                 |
| Temperature, K         | 273.15                                           | 273.15                                 |
| Crystal system         | monoclinic                                       | monoclinic                             |
| space group            | P 21/c                                           | P c a 21                               |
| a, Å                   | 13.9415(14)                                      | 15.914(4)                              |
| b, Å                   | 15.0759(13)                                      | 18.011(5)                              |
| c, Å                   | 9.5585(8)                                        | 13.447(3)                              |
| α, °                   | 90                                               | 90                                     |
| β, °                   | 108.584                                          | 90                                     |
| γ, °                   | 90                                               | 90                                     |
| volume, Å <sup>3</sup> | 1904.3(3)                                        | 3854.5(17)                             |
| Z                      | 4                                                | 8                                      |
| Mg/m <sup>3</sup>      | 1.275                                            | 1.204                                  |
| R (reflections)        | 0.0694                                           | 0.0669                                 |
| Wavelength             | 0.71073                                          | 0.71073                                |
| F(000)                 | 768                                              | 1472                                   |
| CCDC                   | 2163836                                          | 2163825                                |

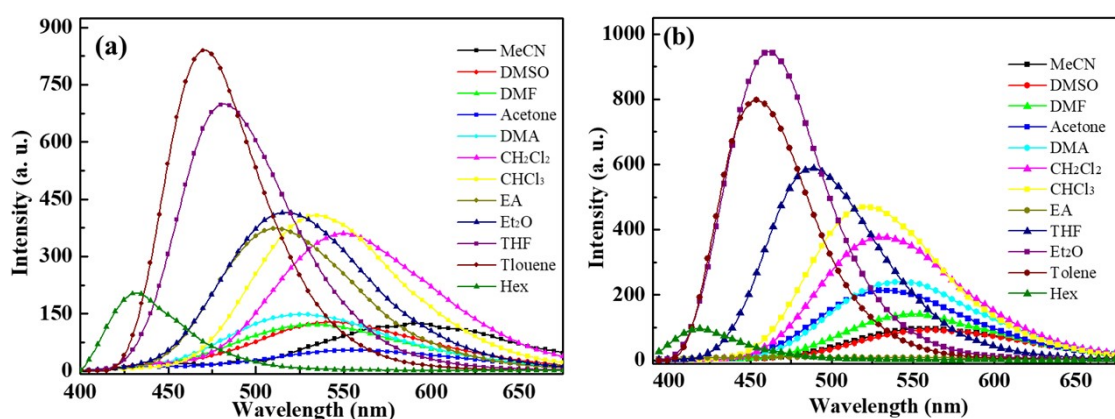**Fig. S4** (a) and (b) fluorescence emission spectra of TPA-SYQ and TPA-BQ in different solvents.

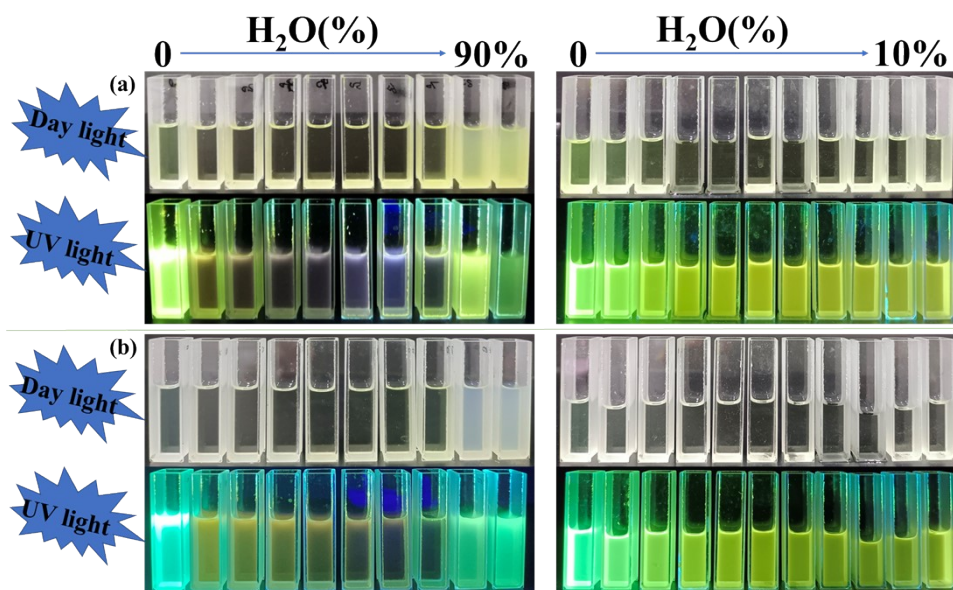

Fig. S5 Photographs of the solution of (a) TPA-SYQ and (b) TPA-BQ in in THF with different water content.

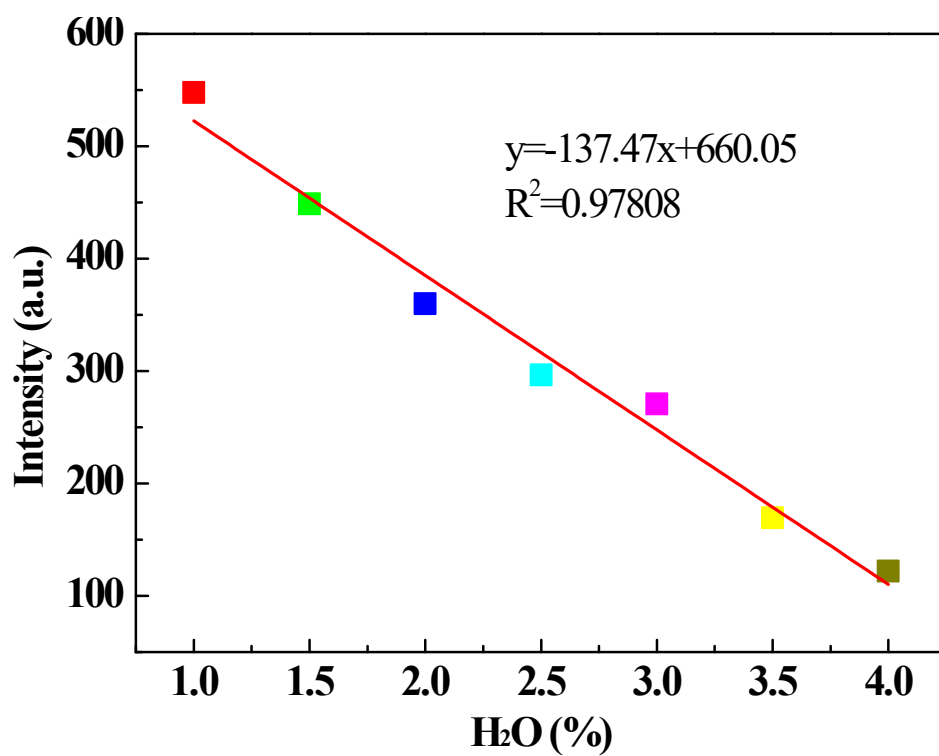

Fig. S6 Plotting for determination of detection limits for TPA-SYQ (detection limit =  $1.0 \times 10^{-6}$  M)

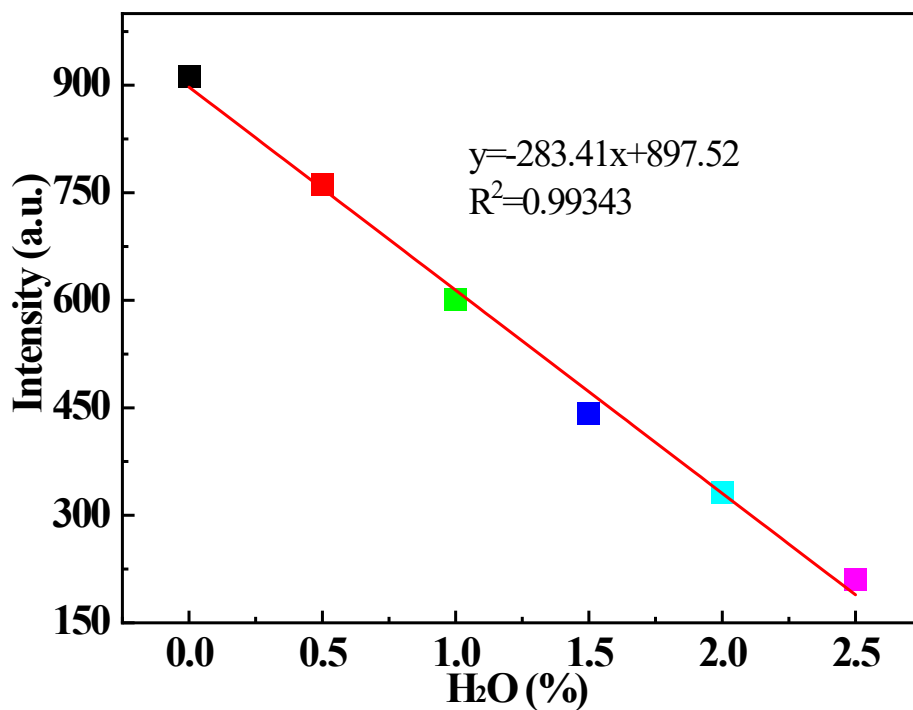

Fig. S7 Plotting for determination of detection limits for TPA-BQ (detection limit =  $5.1 \times 10^{-7}$  M)

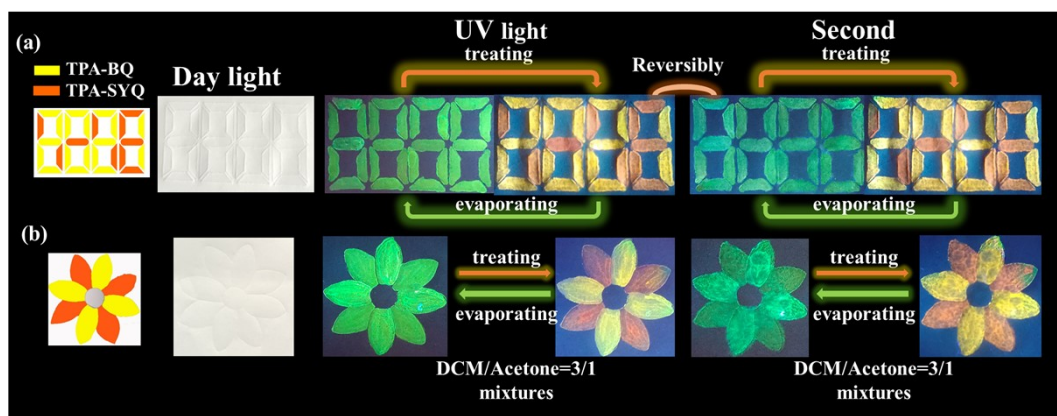

Fig. S8 Photographs of the encryption and anti-counterfeiting applications based on the related materials.



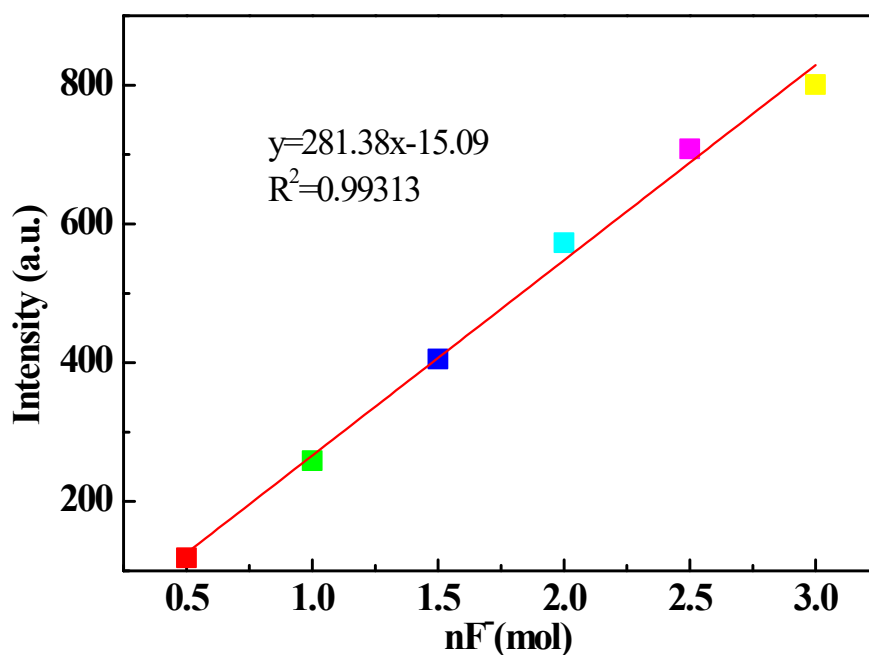

Fig. S9 Plotting for determination of detection limits for TPA-SYQ toward F<sup>-</sup> (detection limit =  $5.1 \times 10^{-7}$  M)

#### Reference:

1. H. Liu, X. Xu, Z. Shi, K. Liu and Y. Fang, *Analytical Chemistry*, 2016, **88**, 10167-10175.
2. J. Do, J. Huh and E. Kim, *Langmuir*, 2009, **25**, 9405-9412.
3. W. Fang, K. Liu, G. Wang, Y. Liang, R. Huang, T. Liu, L. Ding, J. Peng, H. Peng and Y. Fang, *Anal. Chem*, 2021, **93**, 8501-8507.
4. P. Kumar, R. Kaushik, A. Ghosh and D. A. Jose, *Anal. Chem*, 2016, **88**, 11314-11318.
5. H. Sun, X.-X. Tang, B.-X. Miao, Y. Yang and Z. Ni, *Sens. Actuator B-Chem*, 2018, **267**, 448-456.
6. P. Kumar, R. Sakla, A. Ghosh and D. A. Jose, *ACS Appl. Mater. Interfaces*, 2017, **9**, 25600-25605.
7. D. Li, Z. Zhong, G. Zheng and Z. Tian, *Spectroc. Acta. A-Mol Biomol. Spectr*, 2017, **185**, 173-178.
8. Z. Yang, K. Zhang, F. Gong, S. Li, J. Chen, J. S. Ma, L. N. Sobenina, A. I. Mikhaleva, B. A. Trofimov and G. Yang, *J. Photochem. Photobiol. A-Chem*, 2011, **217**, 29-34.
9. P. Alam, V. Kachwal and I. Rahaman Laskar, *Sens. Actuator. B-Chem*, 2016, **228**, 539-550.
